# Supplementary material for: New Insights into the Identity of the DFNA58 Gene
Source: MDPI journal article supplement (doi:10.3390/genes13122274), 2022-12-02
Supplement: s1 [file s1]

**Supplementary Table S1:** List of Zebrafish ages, tissues used, and the amount of each one shown in parentheses.

| <u>Samples for RNA extraction</u> |                     |                                          |
|-----------------------------------|---------------------|------------------------------------------|
| <u>Technique</u>                  | <u>Specimen age</u> | <u>Tissue and quantity used</u>          |
| <u>in situ Hybridization</u>      | <u>5 dpf</u>        | <u>pool of 80 larvae</u>                 |
|                                   | <u>1 year</u>       | <u>whole organism (1)</u>                |
| <u>RT-qPCR</u>                    | <u>4 months</u>     | <u>IE (2)</u>                            |
|                                   |                     | <u>IE (1)</u>                            |
|                                   |                     | <u>pool of Utricule (7) + Lagena (5)</u> |
|                                   | <u>2-3 years</u>    | <u>Heart (2)</u>                         |
|                                   |                     | <u>Swimming bladder (2)</u>              |

**Supplementary Table S2:** List of primers used for real-time quantitative PCR analyses.

| Gene           | Sequence                                                   | Size  | Reason of selection                                                                                                                                                                                   | Reference                                   |
|----------------|------------------------------------------------------------|-------|-------------------------------------------------------------------------------------------------------------------------------------------------------------------------------------------------------|---------------------------------------------|
| <i>Ppp3r1a</i> | F: GCTGTTCAATTCCGAGGGG<br>R: TGCGAGCACATTCCAGGG            | 84bp  | candidate to DFNA58                                                                                                                                                                                   | Lezirovitz et al. 2020                      |
| <i>Ppp3r1b</i> | F: GTCAGATTCTGCACAAGGCG<br>R: TGTGAGCACATCTCCAAGGG         | 84bp  | candidate to DFNA58                                                                                                                                                                                   | Lezirovitz et al. 2020                      |
| <i>Plek</i>    | F: AGGTGCGATAGTCAAACAGGG<br>R: GCCCAGAGGATCATCTTCACC       | 142bp | candidate to DFNA58                                                                                                                                                                                   | Lezirovitz et al. 2020                      |
| <i>Cnrip1b</i> | F: CAGCCTGTTTCAGGTCAGCATACA<br>R: ATGCTGTGAAGCTGTTCCCC     | 109bp | candidate to DFNA58                                                                                                                                                                                   | Lezirovitz et al. 2020                      |
| <i>Cnrip1a</i> | F: CAACTACGACACTGAGGGCG<br>R: AGACGGTTTCGAACATCCCG         | 101bp | candidate to DFNA58                                                                                                                                                                                   | Lezirovitz et al. 2020                      |
| <i>Elavl4</i>  | F: CAGAAGGAGCTGGAACAACCTCT<br>R: GCGAGCCACCTGTGGGG         | 94bp  | Important expression in the IE/ SAG neuronal marker                                                                                                                                                   | Schwarzer et al., 2020; Li et al., 2020     |
| <i>Gab1</i>    | F: TCGACTTGGACCCTGGGAAATCAA<br>R: TGCTGATCCACCAGCACATAGTCT | 106bp | Important expression in the inner ear- IE marker / Associated with DFNB26                                                                                                                             | Yousaf et al., 2018                         |
| <i>Mettl13</i> | F: AGACATGCAGGCTGTCCAATCAGA<br>R: AAGCACTGAGCCCTCTTCCAATCA | 146bp | Important expression in the IE/ Associated with DFNM1                                                                                                                                                 | Yousaf et al., 2018                         |
| <i>Gsdmea</i>  | F: ACTCCGTTTCTCCATCTTGGTC<br>R: AGCTTCGTCAGTCTCAGG         | 103bp | Important expression in the spiral ganglion/ Associated with DFNA5                                                                                                                                    | Hosoya et al., 2016                         |
| <i>Gsdmeb</i>  | F: TCTACAGTCAAACAACCACGAGA<br>R: AGGCACAACACTGGGATCAG      | 141bp | Important expression in the spiral ganglion/ Associated with DFNA5                                                                                                                                    | Hosoya et al., 2016                         |
| <i>Eya4</i>    | F: CCCACTGCCCAAGTATGAA<br>R: GGACTGAATCCACTGCTGCT          | 131bp | Important expression in the spiral ganglion/ Associated with DFNA10                                                                                                                                   | Matsuzaki et al., 2018                      |
| <i>Pou4f1</i>  | F: GGACTCGTCAACAACGGACT<br>R: CACCCCGAGTTTGATCTCC          | 108bp | Important expression in the spiral ganglion/ Sensory neuron marker in zebrafish                                                                                                                       | Lie t al., 2020                             |
| <i>Slc1a3a</i> | F: TGTCGTATCGGGAGGTGAAG<br>R: ACTGTCCAGAGTGCCATTC          | 122bp | Important expression in the inner ear of Zebrafish and low in the surrounding tissues. Mice that are null for this gene have vestibular phenotype of late-onset circling behavior at 7 months of age. | Schraven et al., 2012;; Thisse et al., 2004 |
| <i>Rpl13</i>   | F: AGCTGCGTATTCCAAGAAGA<br>R: ACTGCGATCTTGCTCTCAACG        | 79bp  | Endogenous Gene/Housekeeping/Reference                                                                                                                                                                | Rassier et al., 2020                        |
| <i>Eef1a1</i>  | F: CTGGAGGCCAGCTCAAACAT<br>R: ATCAAGAAGAGTAGTACCGTAGCATTAC | 176bp | Endogenous Gene/Housekeeping/Reference                                                                                                                                                                | Rassier et al., 2020                        |
| <i>Rps18</i>   | F: GGGAAATACAGCCAGGTCCTT<br>R: CACGGTGAGCCCTGATCTTC        | 88bp  | Endogenous Gene/Housekeeping/Reference                                                                                                                                                                | Rassier et al., 2020                        |
| <i>Actb2</i>   | F: CGTGCTGTCTTCCCATCCA<br>R: TCACCAACGTAGCTGTCTTTCTG       | 86bp  | Endogenous Gene/Housekeeping/Reference                                                                                                                                                                | Rassier et al., 2020                        |
| <i>Sep15</i>   | F: CCTGTGAGCTTCTGGGTCAG<br>R: TCAAGGATGGCTCTGGGTA          | 115bp | Endogenous Gene/Housekeeping/Reference                                                                                                                                                                | Xu et al., 2016                             |
| <i>Metap1</i>  | F: CCATGGCCCGGTACAGATA<br>R: CTCCGACATCCCCAAAGGATGA        | 123bp | Endogenous Gene/Housekeeping/Reference                                                                                                                                                                | Xu et al., 2016                             |
| <i>Gapdh</i>   | F: AATTCTGGGATACACGGAGCACCA<br>R: TCAGGTCACATACACGGTTGCTGT | 167bp | Endogenous Gene/Housekeeping/Reference                                                                                                                                                                | Yousaf et al., 2018; Rassier et al., 2020   |

**Supplementary Table S3:** Cycle Threshold (Ct) values of the different genes among the different zebrafish tissues under analysis.

| <i>Gene</i>          | <b>Mean of C<sub>t</sub> ± DP values among the different tissues</b> |            |            |            |            |           |
|----------------------|----------------------------------------------------------------------|------------|------------|------------|------------|-----------|
|                      | <b>LG+UT</b>                                                         | <b>BRN</b> | <b>HRT</b> | <b>SWB</b> | <b>IE</b>  | <b>SD</b> |
| <i>Ppp3r1a</i>       | 28.19±0.81                                                           | 21.76±0.00 | 26.70±0.10 | 17.84±0.32 | 19.84±0.04 |           |
| <i>Ppp3r1b</i>       | 28.60±0.04                                                           | 21.65±0.05 | 23.83±0.09 | 21.85±0.14 | 25.29±0.07 |           |
| <i>Cnrip1b</i>       | 33.44±0.68                                                           | 26.38±0.06 | 34.02±0.24 | 28.18±0.32 | 33.97±0.30 |           |
| <i>Cnrip1a</i>       | 28.87±0.27                                                           | 23.05±0.12 | 28.18±0.10 | 28.09±0.24 | 28.15±0.31 |           |
| <i>Plek</i>          | 29.95±0.25                                                           | 26.83±0.19 | 26.53±0.12 | 27.34±0.08 | 26.42±0.10 |           |
| <i>Slc1a3a</i>       | 25.21±0.11                                                           | 24.51±0.02 | 25.44±0.05 | 23.66±0.06 | 24.59±0.09 |           |
| <i>Eya4</i>          | 29.94±0.53                                                           | 32.78±0.12 | 30.83±0.46 | 32.10±0.40 | 29.42±0.34 |           |
| <i>Elavl4</i>        | 27.88±0.12                                                           | 21.45±0.16 | 29.30±0.18 | 28.37±0.17 | 26.35±0.12 |           |
| <i>GsmdeB/dfna5b</i> | 30.28±0.16                                                           | 28.92±0.37 | 28.32±0.32 | 26.19±0.19 | 27.03±0.06 |           |
| <i>GsmdeA/dfna5a</i> | 30.42±0.12                                                           | 28.27±0.02 | 27.29±0.13 | 26.61±0.24 | 27.20±0.03 |           |
| <i>Pou4f1</i>        | 24.72±0.26                                                           | 24.70±0.19 | undet.     | 26.33±0.11 | 26.97±0.15 |           |
| <i>Gab1</i>          | 30.13±0.31                                                           | 27.14±0.05 | 26.28±0.03 | 23.05±0.12 | 27.31±0.15 |           |
| <i>Mettl13</i>       | 29.21±0.16                                                           | 27.78±0.34 | 29.04±0.5  | 22.95±0.08 | 29.38±0.16 |           |
| <i>Gapdh</i>         | 26.42±0.30                                                           | 21.87±0.07 | 14.97±0.12 | 16.09±0.24 | 18.58±0.04 | 4.50      |
| <i>Actb2</i>         | 21.08±0.30                                                           | 17.28±0.04 | 17.49±0.12 | 15.67±0.22 | 17.17±0.03 | 1.94      |
| <i>Rpl13</i>         | 22.84±0.09                                                           | 19.82±0.30 | 18.65±0.15 | 17.84±0.32 | 19.84±0.04 | 1.83      |

LG+UT=Lagera+Utricle. BRN=Brain. HRT=Heart. SWB=swim bladder. IE=inner ear

SD=standard deviation

**Supplementary Table S4:** List of primers used to perform the amplification of the cDNA that was used as a template for the transcription of the sense and antisense RNA probes in the in situ hybridization experiments, and the size in bp of the expected PCR fragments, as well as where each primer anneals. The bold lowercase letters in the forward and reverse primers correspond to the T7 promoter sequence. All primers anneal in the untranslated regions (UTR), 5' and 3'.

| Genes          | Probes          | Primer name            | Sequence (5'-3')                            | Anneal to | Fragment Size |
|----------------|-----------------|------------------------|---------------------------------------------|-----------|---------------|
| <i>Cnr1p1a</i> | anti-sense      | CNRIP1a-ZF-antisense-F | AAACAGCTTCCTGGGAGCATC                       | Exon 1    | 679 bp        |
|                |                 | CNRIP1a-ZF-antisense-R | taattacgactcactataggagATACCCTGACGGATCGCTTG  | Exon 3    |               |
|                | sense (control) | CNRIP1a-ZF-sense-F     | taattacgactcactataggagAAACAGCTTCCTGGGAGCATC | Exon 1    | 679 bp        |
|                |                 | CNRIP1a-ZF-sense-R     | ATACCCTGACGGATCGCTTG                        | Exon 3    |               |

**Supplementary Table S5:** Relative quantification of each gene in the different tissues analyzed in zebrafish. In the last column, genes differentially expressed between hair cells and their surrounding cells, among those studied by us, are highlighted studied in zebrafish.

|                       | Zebrafish adult (11-13 months) |                  | Zebrafish adult (3 months) | Zebrafish adult (~36 months) | Zebrafish adult (11-13 months) |
|-----------------------|--------------------------------|------------------|----------------------------|------------------------------|--------------------------------|
| Ref                   | Barta et al.. 2018             |                  | Oosterhof et al.. 2017     | Baumgart et al.. 2016        | Barta et al.. 2018             |
| Gene                  | Cell/tissue                    |                  |                            |                              | Fold difference (Log2)         |
|                       | HC                             | ncSC             | Microglial                 | Liver                        | CC/ncSC                        |
| <i>Plek</i>           | 2.65±2.96                      | 1.4±0.43         | 96.19±19.13                | 0.94±0.67                    | -----                          |
| <i>Ppp3r1a</i>        | 6.99±0.99                      | 3.75±0.51        | 8.93±4.60                  | 2.19±0.26                    | -----                          |
| <i>Ppp3r1b</i>        | 10.63±0.77                     | 12.80±0.14       | 20.96±1.06                 | 6.85±0.44                    | -----                          |
| <b><i>Cnrip1a</i></b> | <b>52.01±1.17</b>              | <b>0.92±0.27</b> | <b>0.32±0.32</b>           | <b>0.07±0.04</b>             | <b>5.83</b>                    |
| <i>Cnrip1b</i>        | 0                              | 0                | 0.00                       | 0.02±0.03                    | -----                          |
| <i>Slc1a3a</i>        | <b>62.12±2.58</b>              | <b>5.17±0.5</b>  | 40.56±3.32                 | 32.43±3.02                   | <b>3.59</b>                    |
| <i>Eya4</i>           | <b>140.07±3.29</b>             | <b>2.38±0.27</b> | 0.10±0.17                  | 0.33±0.11                    | <b>5.88</b>                    |
| <i>Elavl4</i>         | 4.00±0.18                      | 2.29±0.6         | 1.14±0.17                  | 0.02±0.01                    | -----                          |
| <i>Gsmdea</i>         | 0                              | 0.2±0.03         | 2.55±1.01                  | 4.79±1.47                    | 0.20                           |
| <i>Gsmdeb</i>         | 5.5±0.2                        | 4.85±0.56        | 0.24±0.26                  | 0.00                         | -----                          |
| <i>Pou4f1</i>         | <b>35.65±2.45</b>              | <b>0.11±0.02</b> | 0.09±0.1                   | 0                            | <b>8.30</b>                    |
| <i>Gab1</i>           | 6.98±0.13                      | 8.94±1.24        | 8.57±3.03                  | 2.87±0.61                    | -----                          |
| <i>Mettl13</i>        | 0.37±0.07                      | 0.98±0.03        | 1.38±0.89                  | 0.42±0.1                     | <b>1.39</b>                    |

Supplementary Table S6: RPKM values of the Li et al. (2018) study performed with mice.

| Mouse (P28-P35)    |                    |                  |                  |                  |                    |                        |
|--------------------|--------------------|------------------|------------------|------------------|--------------------|------------------------|
| Ref                | Li et al.. 2018    |                  |                  |                  |                    |                        |
| <i>Gene</i>        | IHC                | OHC              | DEG<br>(IHC/OHC) | Deiters          | Pilar              | DEG<br>(Deiters/Pilar) |
| <i>Plek</i>        | 0.00               | 0.15±0.06        | ---              | 1.32±0.14        | 1.97±0.13          | ---                    |
| <i>Ppp3r1</i>      | 17.34±1.55         | 9.95±0.87        | 0.80             | 29.84±2.05       | 14.63±1.25         | 1.03                   |
| <i>Cnrip1</i>      | 0.11±0.06          | 0.23±0.04        | -1.06            | 0.85±0.19        | 0.61±0.13          | 0.48                   |
| <i>Slc1a3</i>      | <b>131.02±1.47</b> | <b>7.67±0.25</b> | <b>2.02</b>      | <b>5.53±0.34</b> | <b>213.19±1.22</b> | <b>-5.27</b>           |
| <i>Eya4</i>        | 7.24±0.13          | 12.32±0.82       | -0.77            | 5.63±0.44        | 9.25±0.42          | -0.72                  |
| <i>Elavl4</i>      | 0.61±0.07          | 0.8±0.09         | -0.39            | 1.88±0.1         | 0.82±0.18          | 1.20                   |
| <i>Gsmde/Dfna5</i> | 0.62±0.1           | 0.27±0.05        | 1.20             | 0.65±0.09        | 0.95±0.15          | -0.55                  |
| <i>Pou4f1</i>      | 0.00               | 0.00             | ---              | 0.02±0.03        | 0.15±0.05          | ---                    |
| <i>Gab1</i>        | 12.36±0.5          | 9.18±0.65        | 0.43             | 41.04±1.15       | 28.14±0.90         | 0.54                   |
| <i>Mettl13</i>     | 0.79±0.02          | 1.78±0.21        | -1.17            | 2.36±0.28        | 2.15±0.20          | 0.13                   |

**Supplementary Table S7:** Gene expression of literature data regarding genes and tissues studied in zebrafish.

| Gene expression                      |             |                                                   |                         |    |     |                  |              |                         |
|--------------------------------------|-------------|---------------------------------------------------|-------------------------|----|-----|------------------|--------------|-------------------------|
| Gene                                 | Age studied | Organ/Tissue                                      |                         |    |     |                  |              | Ref.                    |
|                                      |             |                                                   | Brain                   | IE | Eye | Heart            | Swim bladder |                         |
| <i>Cnrip1a</i><br>ENSDARG00000037337 | 10 hpf      | whole larval body                                 |                         |    |     |                  |              | Fin et al., 2017        |
|                                      | ?           | Heart                                             | X                       |    |     |                  |              | BGEE database           |
|                                      | ?           | Swim bladder                                      |                         |    |     |                  | X            | BGEE database           |
|                                      | ?           | Inner Ear                                         | X                       |    |     |                  |              | BGEE database           |
|                                      | ?           | Brain                                             | X                       |    |     |                  |              | BGEE database           |
|                                      | 24-60 hpf   | Telencephalon                                     | X                       |    |     |                  |              | Fin et al., 2017        |
|                                      | 24-60 hpf   | anterior and postoptic commissure. pineal gland   | X                       |    |     |                  |              | Fin et al., 2017        |
|                                      | 24-60 hpf   | hindbrain                                         | X                       |    |     |                  |              | Fin et al., 2017        |
|                                      | 24-60 hpf   | spinal cord                                       |                         |    |     |                  |              | Fin et al., 2017        |
|                                      | 24-60 hpf   | retinal ganglion cells. other ganglia of the head | X                       |    |     |                  |              | Fin et al., 2017        |
|                                      | ?           | Inner Ear                                         | X                       |    |     |                  |              | BGEE database           |
|                                      | 24-60 hpf   | cnrip1a regions of postmitotic neurons            |                         |    |     |                  |              | Fin et al., 2017        |
|                                      | 24-60 hpf   | olfactory receptors                               |                         |    |     |                  |              | Fin et al., 2017        |
| <i>Cnrip1b</i><br>ENSDARG00000037337 | 10 hpf      | whole larval body                                 |                         |    |     |                  |              | Fin et al., 2017        |
|                                      | ?           | Heart                                             | X                       |    |     |                  |              | BGEE database           |
|                                      | ?           | Swim bladder                                      |                         |    |     |                  | X            | BGEE database           |
|                                      | ?           | Eye                                               | X                       |    |     |                  |              | BGEE database           |
|                                      | ?           | Brain                                             | X                       |    |     |                  |              | BGEE database           |
|                                      |             | diffuse spinal cord                               | X                       |    | X   | Fin et al., 2017 |              | [51]                    |
|                                      | 24-48 hpf   | somites and pectoral fins                         | X                       |    | X   |                  |              | Fin et al., 2017        |
| <i>Ppp3r1a</i><br>ENSDARG00000092659 | ?           | Heart                                             | X                       |    |     |                  |              | BGEE database           |
|                                      | ?           | Swim bladder                                      |                         |    |     |                  | X            | BGEE database           |
|                                      | ?           | Eye                                               | X                       |    |     |                  |              | BGEE database           |
|                                      | ?           | Brain                                             | X                       |    |     |                  |              | BGEE database           |
|                                      | 72-96 hpf   | Epiphase and olfactory bulb                       | X                       |    |     |                  |              | Hammond & Udvadia, 2010 |
| <i>Ppp3r1b</i><br>ENSDARG00000069360 | ?           | Heart                                             | X                       |    |     |                  |              | BGEE database           |
|                                      | ?           | Swim bladder                                      |                         |    |     |                  | X            | BGEE database           |
|                                      | ?           | Eye                                               | X                       |    |     |                  |              | BGEE database           |
|                                      | 72-96 hpf   | Brain                                             | X                       |    |     |                  |              | BGEE database           |
|                                      |             | Liver                                             | Hammond & Udvadia, 2010 |    |     |                  | [78]         |                         |

|                                                              |                            | optic tectum                        | X       | Hammond & Udvadia, 2010 |     |       |              | [78]                        |
|--------------------------------------------------------------|----------------------------|-------------------------------------|---------|-------------------------|-----|-------|--------------|-----------------------------|
|                                                              | 72-96 hpf                  | olfactory bulb                      | X       |                         |     |       |              | Hammond & Udvadia, 2010     |
|                                                              |                            |                                     |         |                         |     |       |              |                             |
| <i>Plek</i><br>ENSDARG00000104325                            | ?                          | Heart                               | X       |                         |     |       |              | BGEE database               |
|                                                              | ?                          | Swim bladder                        | X       |                         |     |       |              | BGEE database               |
|                                                              | ?                          | Eye                                 | X       |                         |     |       |              | BGEE database               |
|                                                              | ?                          | Brain                               | X       |                         |     |       |              | BGEE database               |
|                                                              |                            |                                     |         |                         |     |       |              |                             |
| Gene expression                                              |                            |                                     |         |                         |     |       |              |                             |
| Gene                                                         | Age studied                | Organ/Tissue                        |         |                         |     |       |              | Ref.                        |
|                                                              |                            |                                     | Cérebro | IE                      | Eye | Heart | Swim bladder |                             |
| <i>Elavl4</i><br>ENSDARG00000045639<br>Marcador pan-neuronal | 30-42 hpf                  | Heart                               | X       |                         |     |       |              | BGEE database               |
|                                                              | ?                          | Swim bladder                        | X       |                         |     |       |              | BGEE database               |
|                                                              | ?                          | Eye                                 | X       |                         |     |       |              | BGEE database               |
|                                                              | all                        | statoacoustic ganglion              | X       | X                       |     |       |              | Schwarzer et al., 2020      |
|                                                              | 24-60 hpf                  | Brain                               | X       |                         |     |       |              | Hao et al., 2017            |
|                                                              |                            |                                     |         |                         |     |       |              |                             |
| <i>Gsdmeb (Dfna5)</i><br>ENSDARG00000040485                  | 22-24 hpf                  | Neural crest. olfactory placode     | X       |                         |     |       |              | Busch-Nentwich et al., 2003 |
|                                                              | ?                          | Eye                                 | X       |                         |     |       |              | BGEE database               |
|                                                              | ?                          | Brain                               | X       |                         |     |       |              | BGEE database               |
|                                                              | ?                          | Swim bladder                        | X       |                         |     |       |              | BGEE database               |
|                                                              | 30-42 hpf                  | Heart                               | X       |                         |     |       |              | Thisse & Thisse, 2004       |
|                                                              | 48-60 hpf                  | Otic vesicle and semicircular canal | X       |                         |     |       |              | Blasiole et al., 2006       |
|                                                              | 48-90 hpf                  | Semicircular canal                  | X       |                         |     |       |              | Blasiole et al., 2006       |
|                                                              |                            |                                     |         |                         |     |       |              |                             |
| <i>Gsdmea (Dfna5)</i><br>ENSDARG00000086762                  | ?                          | Swim bladder                        | X       |                         |     |       |              | BGEE database               |
|                                                              | ?                          | Brain                               | X       |                         |     |       |              | BGEE database               |
|                                                              | ?                          | Heart                               | X       |                         |     |       | X            | BGEE database               |
|                                                              | 5-6 dpf                    | Neuromasts                          |         |                         |     |       |              | Jian et al., 2014           |
|                                                              |                            |                                     |         |                         |     |       |              |                             |
| <i>Eya4</i><br>ENSDARG00000012397                            | Adult > 90 dpf             | Heart                               | X       |                         |     |       |              | Schonberger et al.. 2005    |
|                                                              | 24-96 hpf / Adult > 60 dpf | Anterior and posterior macula       | X       |                         |     |       |              | Wang et al.. 2008           |
|                                                              | 72-96 hpf / Adult > 60 dpf | Lateral crista                      | X       |                         |     |       |              | Wang et al.. 2008           |
|                                                              | 24-96                      | Neuromast                           |         |                         |     |       |              | Schonberger et al.. 2005    |
|                                                              | 14-19 hpf                  | Otic placode                        |         |                         |     |       |              | Wang et al.. 2008           |
|                                                              | 48-60 hpf / Adult > 60 dpf | Otic vesicle                        | X       |                         |     |       |              | Wang et al.. 2008           |
|                                                              | 24-42 hpf / Adult > 60 dpf | SAG                                 | SAG     |                         |     |       |              | Wang et al.. 2008           |



|                                          |                         |                        |     |                       |
|------------------------------------------|-------------------------|------------------------|-----|-----------------------|
|                                          | ?                       | Swim bladder           | X   | BGEE database         |
| <i>Gab1</i><br><i>ENSDARG00000037018</i> | ?                       | Swim bladder           | X   | BGEE database         |
|                                          | ?                       | Heart                  | X   | BGEE database         |
|                                          | 12-48 hpf               | Brain and otic vesicle | X X | Yousaf et al., 2018   |
| <i>Mettl13</i>                           | ?                       | Swim bladder           | X   | BGEE database         |
|                                          | 12-48 hpf               | Brain and otic vesicle | X X | Yousaf et al., 2018   |
| <i>Slc1a3a</i>                           | 72-96                   | Brain                  | X   | Breuer et al., 2019   |
|                                          | 72-96                   | Glial cell             | SNC | Gesemann et al., 2010 |
|                                          | 5-6 dpf                 | Lateral line           |     | Thisse & Thisse, 2004 |
|                                          | 5-6 dpf                 | Glial cells            | SNC | Gesemann et al., 2010 |
|                                          | 19-60                   | Otic vesicle           | X   | Thisse & Thisse, 2004 |
|                                          | 19-60                   | Spinal cord            | SNC | Thisse & Thisse, 2004 |
|                                          | Adult > 90 dpf          | Cerebellum             | X   | Rico et al., 2010     |
|                                          | Adult > 90 dpf          | Liver                  |     | Cheng et al., 2006    |
|                                          | Adult > 90 dpf          | Brain                  | X   | Rico et al., 2010     |
| <i>Pou4f1</i>                            | 16 hpf - Adult > 90 dpf | Brain                  | X   | Sato et al., 2007     |
|                                          | 32-72                   | Eye                    | X   | Sato et al., 2007     |
|                                          | 52hpf-77hpf             | Otic Vesicle           | X   | Sato et al., 2007     |
|                                          | 24-72                   | Heart                  | X   | Maskell et al., 2017  |

## qPCR analysis - Zebrafish

### Controls genes

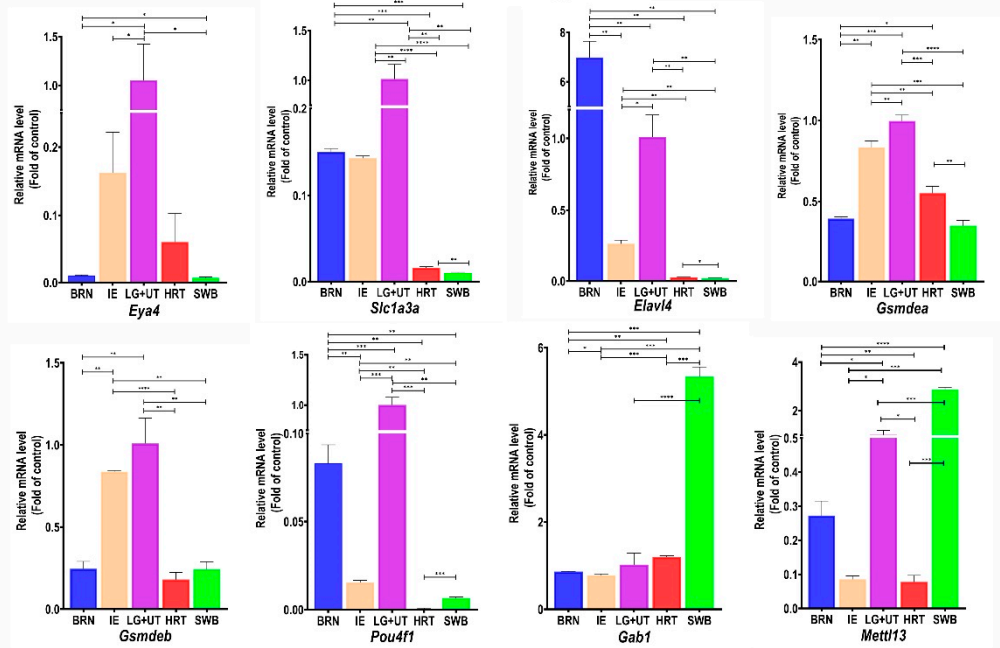

Supplementary Figure S1: Expression analysis (RT-qPCR) of the reference/control genes in the adult zebrafish tissues.

## ADDITIONAL REFERENCES

BGEE database - <https://bgee.org/>

Blasiolo B, Canfield VA, Vollrath MA, Huss D, Mohideen MA, Dickman JD, Cheng KC, Fekete DM, Levenson R. Separate Na,K-ATPase genes are required for otolith formation and semicircular canal development in zebrafish. *Dev Biol.* 2006 Jun 1;294(1):148-60. doi: 10.1016/j.ydbio.2006.02.034.

Breuer, M.; Guglielmi, L.; Zielonka, M.; Hemberger, V.; Kölker, S.; Okun, J.G.; Hoffmann, G.F.; Carl, M.; Sauer, S.W.; Opladen, T. QDPR homologues in *Danio rerio* regulate melanin synthesis, early gliogenesis, and glutamine homeostasis. *PLoS One.*, 2019, 14, e0215162. doi: 10.1371/journal.pone.0215162. eCollection 2019.

Cheng, W.; Guo, L.; Zhang, Z.; Soo, H.M.; Wen, C.; Wu, W.; Peng, J. HNF factors form a network to regulate liver-enriched genes in zebrafish. *Dev Biol.*, 2006, 294, 482-96. doi: 10.1016/j.ydbio.2006.03.018.

Gesemann, M.; Lesslauer, A.; Maurer, C.M.; Schönthaler, H.B.; Neuhauss, S.C. Phylogenetic analysis of the vertebrate excitatory/neutral amino acid transporter (SLC1/EAAT) family reveals lineage specific subfamilies. *BMC Evol Biol.*, 2010, 10, 117. doi: 10.1186/1471-2148-10-117.

Hammond, D.R.; Udvadia, A.J. Cabin1 expression suggests roles in neuronal development. *Dev Dyn.*, 2010, 239, 2443-51, doi: 10.1002/dvdy.22367.

Hao le T, Duy PQ, An M, Talbot J, Iyer CC, Wolman M, Beattie CE. HuD and the Survival Motor Neuron Protein Interact in Motoneurons and Are Essential for Motoneuron Development, Function, and mRNA Regulation. *J Neurosci.*, 2017, 37, 11559-11571. doi: 10.1523/JNEUROSCI.1528-17.2017.

Hosoya M, Fujioka M, Ogawa K, Okano H. Distinct Expression Patterns Of Causative Genes Responsible For Hereditary Progressive Hearing Loss In Non-Human Primate Cochlea. *Sci Rep.* 2016 Feb 26;6:22250. doi: 10.1038/srep22250.

Lu FI, Thisse C, Thisse B. Identification and mechanism of regulation of the zebrafish dorsal determinant. *Proc Natl Acad Sci U S A.* 2011 Sep 20;108(38):15876-80. doi: 10.1073/pnas.1106801108.

Rico, E.P.; de Oliveira, D.L.; Rosemberg, D.B.; Mussulini, B.H.; Bonan, C.D.; Dias, R.D.; Wofchuk, S.; Souza, D.O.; Bogo, M.R. Expression and functional analysis of Na(+)-dependent glutamate transporters from zebrafish brain. *Brain Res Bull.*, 2010, 81, 517-23. doi: 10.1016/j.brainresbull.2009.11.011.

Sato, T.; Hamaoka, T.; Aizawa, H.; Hosoya, T.; Okamoto, H. Genetic single-cell mosaic analysis implicates ephrinB2 reverse signaling in projections from the posterior tectum to the hindbrain in zebrafish. *J Neurosci.*, 2007, 27, 5271-9. doi: 10.1523/JNEUROSCI.0883-07.2007.

Schönberger, J.; Wang, L.; Shin, J.T.; Kim, S.D.; Depreux, F.F.; Zhu, H.; Zon, L.; Pizard, A.; Kim, J.B.; Macrae, C.A.; Mungall, A.J.; Seidman, J.G.; Seidman, C.E. Mutation in the transcriptional coactivator EYA4 causes dilated cardiomyopathy and sensorineural hearing loss. *Nat Genet.*, 2005, 37, 418-22. doi: 10.1038/ng1527.

Wang, L.; Sewell, W.F.; Kim, S.D.; Shin, J.T.; MacRae, C.A.; Zon, L.I.; Seidman, J.G.; Seidman, C.E. Eya4 regulation of Na<sup>+</sup>/K<sup>+</sup>-ATPase is required for sensory system development in zebrafish. *Development.*, 2008, 135, 3425-34. doi: 10.1242/dev.012237.
